# Supplementary material
Source: Elsevier journal article supplement (https://www.sciencedirect.com/science/article/pii/S1887836921000417)
Supplement: mmc3 [file S1887836921000417:mmc3.docx]

1. Fan Q, Cavus O, Xiong L, Xia Y. Spinal Cord Injury: How Could Acupuncture Help? J Acupunct Meridian Stud. 2018 Aug;11(4):124-132. doi: 10.1016/j.jams.2018.05.002.
2. Lei H, Fu Y, Xu G, Yin Z, Zhao L, Liang F. Different types of acupuncture and moxibustion therapy for neurogenic bladder after spinal cord injury: A systematic review and network meta-analysis study protocol. Medicine (Baltimore). 2020 Jan;99(1):e18558. doi: 10.1097/MD.0000000000018558.
3. Zhu Y, Yang Y, Li J. Does acupuncture help patients with spasticity? A narrative review. Ann Phys Rehabil Med. 2019 Jul;62(4):297-301. doi: 10.1016/j.rehab.2018.09.010.
4. Yang GF, Sun D, Wang XH, Chong L, Luo F, Fang CB. Effectiveness of rehabilitation training combined acupuncture for the treatment of neurogenic bladder secondary to spinal cord injury. Medicine (Baltimore). 2019 Sep;98(39):e17322. doi: 10.1097/MD.0000000000017322.
5. Wong AM, Leong CP, Su TY, Yu SW, Tsai WC, Chen CP. Clinical trial of acupuncture for patients with spinal cord injuries. Am J Phys Med Rehabil. 2003 Jan;82(1):21-7. doi: 10.1097/00002060-200301000-00004.
6. Wang X, Ju S, Chen S, Gao W, Ding J, Wang G, Cao H, Tian H, Li X. Effect of Electro-Acupuncture on Neuroplasticity of Spinal Cord-Transected Rats. Med Sci Monit. 2017 Sep 2;23:4241-4251. doi: 10.12659/msm.903056.
7. Yan Q, Ruan JW, Ding Y, Li WJ, Li Y, Zeng YS. Electro-acupuncture promotes differentiation of mesenchymal stem cells, regeneration of nerve fibers and partial functional recovery after spinal cord injury. Exp Toxicol Pathol. 2011 Jan;63(1-2):151-6. doi: 10.1016/j.etp.2009.11.002.
8. Paola FA, Arnold M. Acupuncture and spinal cord medicine. J Spinal Cord Med. 2003 Spring;26(1):12-20. doi: 10.1080/10790268.2003.11753654.
9. Ma R, Liu X, Clark J, Williams GM, Doi SA. The Impact of Acupuncture on Neurological Recovery in Spinal Cord Injury: A Systematic Review and Meta-Analysis. J Neurotrauma. 2015 Dec 15;32(24):1943-57. doi: 10.1089/neu.2014.3866.
10. Xu J, Cheng S, Jiao Z, Zhao Z, Cai Z, Su N, Liu B, Zhou Z, Li Y. Fire Needle Acupuncture Regulates Wnt/ERK Multiple Pathways to Promote Neural Stem Cells to Differentiate into Neurons in Rats with Spinal Cord Injury. CNS Neurol Disord Drug Targets. 2019;18(3):245-255. doi: 10.2174/1871527318666190204111701.
11. Shin BC, Lee MS, Kong JC, Jang I, Park JJ. Acupuncture for spinal cord injury survivors in Chinese literature: a systematic review. Complement Ther Med. 2009 Oct-Dec;17(5-6):316-27. doi: 10.1016/j.ctim.2009.09.001.
12. Widrin C. Scalp Acupuncture for the Treatment of Motor Function in Acute Spinal Cord Injury: A Case Report. J Acupunct Meridian Stud. 2018 Apr;11(2):74-76. doi: 10.1016/j.jams.2018.01.002.
13. Choi DC, Lee JY, Moon YJ, Kim SW, Oh TH, Yune TY. Acupuncture-mediated inhibition of inflammation facilitates significant functional recovery after spinal cord injury. Neurobiol Dis. 2010 Sep;39(3):272-82. doi: 10.1016/j.nbd.2010.04.003.
14. Moldenhauer S, Burgauner M, Hellweg R, Lun A, Hohenböken M, Dietz E, Kiesewetter H, Salama A, Moldenhauer A. Mobilization of CD133(+)CD34(-) cells in healthy individuals following whole-body acupuncture for spinal cord injuries. J Neurosci Res. 2010 Jun;88(8):1645-50. doi: 10.1002/jnr.22329.
15. Liu F, Zou Y, Liu S, Liu J, Wang T. Electro-acupuncture treatment improves neurological function associated with downregulation of PDGF and inhibition of astrogliosis in rats with spinal cord transection. J Mol Neurosci. 2013 Oct;51(2):629-35. doi: 10.1007/s12031-013-0035-3.
16. Huang SF, Ding Y, Ruan JW, Zhang W, Wu JL, He B, Zhang YJ, Li Y, Zeng YS. An experimental electro-acupuncture study in treatment of the rat demyelinated spinal cord injury induced by ethidium bromide. Neurosci Res. 2011 Jul;70(3):294-304. doi: 10.1016/j.neures.2011.03.010.
17. Juarez Becerril O, Salgado Ceballos H, Anguiano Solis C, Alvarado Sanchez B, Lopez Hernandez ME, Diaz Ruiz A, Torres Castillo S. Electro-Acupuncture at GV.4 Improves Functional Recovery in paralyzed rats after a Traumatic Spinal Cord Injury. Acupunct Electrother Res. 2015;40(4):355-69.
18. Tan, L., Qin, Z., Zhu, F., Yang, L. Effect of electro-acupuncture combined with olfactory ensheathing cell transplantation on spinal cord injury axonal regeneration and direction. *China J orthope and trauma* 2015;28 (5):441-445.
19. Li L, Zhou D,Yang Y. Effects of Du Mai electroacupuncture combined with swim training on differentiation of neural stem cell after spinal cord injury in rats. [*Chi J*](https://www-scopus-com.ez.unisabana.edu.co/sourceid/3900148613?origin=recordpage) *Rehabil Medi*. 2016; 31(2): 172-176.
20. Ding L-L-Q, Hu S-F, He X-W, Zhang P, Zhao F-F, Liu T-P, et al. Acupuncture combined with moxibustion promote the recovery of spinal cord injury in correlation with Shh/Gli-1 signaling pathway. J Spinal Cord Med. 2020;
21. Mo Y-P, Yao H-J, Lv W, Song L-Y, Song H-T, Yuan X-C, et al. Effects of Electroacupuncture at Governor Vessel Acupoints on Neurotrophin-3 in Rats with Experimental Spinal Cord Injury. Neural Plast. 2016;2016.
22. Liu J, Wu Y. Electro-acupuncture-modulated miR-214 prevents neuronal apoptosis by targeting Bax and inhibits sodium channel Nav1.3 expression in rats after spinal cord injury. Biomed Pharmacother. 2017;89:1125–35.
23. Chen W, Wu Y. Electro-acupuncture (EA) mediated downregulation of microRNA-181a alleviates spinal cord neuronal apoptosisby inhibition of p38 MAPK pathway. Int J Clin Exp Med. 2017;10(5):7806–15.
24. Zhao J, Wang L, Li Y. Electroacupuncture alleviates the inflammatory response via effects on M1 and M2 macrophages after spinal cord injury. Acupunct Med. 2017;35(3):224–30.
25. Zhang J, Li S, Wu Y. Recovery of spinal cord injury following electroacupuncture in rats through enhancement of Wnt/β-catenin signaling. Mol Med Rep. 2017;16(2):2185–90.
26. Cai W, Shen W-D. Anti-apoptotic mechanisms of acupuncture in neurological diseases: A review. Am J Chin Med. 2018;46(3):515–35.
27. Tu W-Z, Li S-S, Jiang X, Qian X-R, Yang G-H, Gu P-P, et al. Effect of electro-acupuncture on the BDNF-TrkB pathway in the spinal cord of CCI rats. Int J Mol Med. 2018;41(6):3307–15.
28. Huang H, Young W, Skaper S, Chen L, Moviglia G, Saberi H, et al. Clinical Neurorestorative Therapeutic Guidelines for Spinal Cord Injury (IANR/CANR version 2019). J Orthop Transl. 2020;20:14–24.
29. Zhang L, Lin H, Tu W. Effects of electro-acupuncture on functional recovery and neurotrophic factor expressions in chronic spinal cord injury rats. Chinese J Rehabil Med. 2014;29(4):311–5.
30. Li W-J, Li S-M, Ding Y, He B, Keegan J, Dong H, et al. Electro-acupuncture upregulates CGRP expression after rat spinal cord transection. Neurochem Int. 2012;61(8):1397–403.
31. Chen Y-C, Qi W-L, Kong K-M. Effect of electro-acupunture on expression changes of nerve growth factor and receptor in rats with acute spinal cord injury. Chinese J Clin Rehabil. 2006;10(11):129–31.
32. Zhao W, Chai Y, Fang Q-M, Yang C. Effect of small interferon RNA combined with electro-acupuncture on the expression of connective tissue growth factor after spinal cord injury in rats. Acta Anat Sin. 2016;47(2):185–90.
